# Supplementary material for: Adverse Effects of Toxic Metal Pollution in Rivers on the Physiological Health of Fish
Source: MDPI journal article supplement (doi:10.3390/toxics10090528), 2022-09-08
Supplement: s1 [file s1]

**Table S1.** Observed significant correlations ( $p < 0.05$ ) between metal concentrations in water and their accumulation in tissues of common carp (*Cyprinus carpio*), silver carp (*Hypophthalmic molitrix*), and tilapia (*Oreochromis niloticus*) for study seasons and regions

|             |           | Zn |   |   | Cu |   |   | Cd |   |   | Pb |   |   |
|-------------|-----------|----|---|---|----|---|---|----|---|---|----|---|---|
|             |           | G  | L | K | G  | L | K | G  | L | K | G  | L | K |
| Common carp | Autumn    | -  | - | - | -  | - | - | -  | - | - | -  | - | - |
|             | Winter    | -  | - | - | -  | - | - | -  | - | - | -  | - | - |
|             | Spring    | -  | - | + | -  | - | + | -  | - | - | -  | - | - |
|             | Summer    | -  | - | - | -  | - | - | -  | - | - | +  | + | - |
| Silver carp | Autumn    | -  | - | - | -  | - | - | -  | - | - | -  | - | - |
|             | Winter    | -  | - | - | -  | + | - | -  | - | - | -  | - | - |
|             | Spring    | -  | - | - | -  | - | - | -  | - | - | -  | - | - |
|             | Summer    | -  | - | - | -  | - | - | -  | - | - | -  | - | - |
| Tilapia     | Autumn    | -  | - | + | +  | - | - | -  | - | - | -  | + | - |
|             | Winter    | -  | - | - | -  | - | - | -  | - | - | +  | - | - |
|             | Spring    | -  | - | - | -  | - | - | -  | - | - | -  | - | - |
|             | Summer    | -  | - | - | -  | - | + | -  | - | - | -  | - | - |
| Common carp | Ha Noi    | -  | - | - | -  | - | - | +  | - | - | -  | - | + |
|             | Ha Nam    | -  | - | - | -  | - | - | -  | - | + | -  | - | + |
|             | Ninh Binh | -  | - | - | -  | - | - | +  | + | - | -  | - | - |
|             | Nam Dinh  | -  | - | - | -  | - | + | +  | - | - | +  | - | - |
| Silver carp | Ha Noi    | -  | - | - | -  | - | - | -  | - | - | -  | - | - |
|             | Ha Nam    | -  | - | - | -  | - | - | +  | - | - | -  | + | - |
|             | Ninh Binh | -  | - | - | -  | - | - | -  | - | - | -  | - | - |
|             | Nam Dinh  | -  | - | - | -  | - | - | -  | - | - | -  | - | - |
| Tilapia     | Ha Noi    | -  | - | - | -  | - | - | -  | - | - | -  | - | - |
|             | Ha Nam    | -  | - | + | -  | - | - | -  | - | - | -  | + | + |
|             | Ninh Binh | -  | - | - | -  | - | - | +  | - | - | -  | - | - |
|             | Nam Dinh  | -  | - | - | -  | - | - | +  | - | - | -  | - | - |

Notes: G: gills; L: livers; K: kidneys; Correlation (+); no correlation (-)

**Table S2.** Annual metals variation in the gills, livers, and kidneys of common carp (*Cyprinus carpio*), silver carp (*Hypophthalmic molitrix*), and tilapia (*Oreochromis niloticus*) collected from different sites. The data is presented as mean  $\pm$  SEM. Small letters (a > b) represent statistically significant differences between sampling years within the same tissue samples from the same species. The capital letters (A > B > C) represent statistically significant differences between tissues of each species within each year.

|                                                         | <i>C. carpio</i>                |                                | <i>H. molitrix</i>            |                               | <i>O. niloticus</i>            |                                |
|---------------------------------------------------------|---------------------------------|--------------------------------|-------------------------------|-------------------------------|--------------------------------|--------------------------------|
|                                                         | The year 2013                   | The year 2014                  | The year 2013                 | The year 2014                 | The year 2013                  | The year 2014                  |
| Zn concentration (mg kg <sup>-1</sup> wet weight)       |                                 |                                |                               |                               |                                |                                |
| Gills                                                   | 190 $\pm$ 25 <sup>aAB</sup>     | 180 $\pm$ 25 <sup>aA</sup>     | 28 $\pm$ 5.1 <sup>aB</sup>    | 24 $\pm$ 4.2 <sup>aB</sup>    | 30 $\pm$ 3.1 <sup>aB</sup>     | 29 $\pm$ 3.0 <sup>aB</sup>     |
| Liver                                                   | 118 $\pm$ 25 <sup>abB</sup>     | 97 $\pm$ 15 <sup>aB</sup>      | 47 $\pm$ 7.3 <sup>aA</sup>    | 42 $\pm$ 5.9 <sup>aA</sup>    | 35 $\pm$ 3.1 <sup>aB</sup>     | 35 $\pm$ 6.1 <sup>aB</sup>     |
| Kidneys                                                 | 227 $\pm$ 42 <sup>aA</sup>      | 207 $\pm$ 34 <sup>aA</sup>     | 37 $\pm$ 6.2 <sup>aAB</sup>   | 38 $\pm$ 9.1 <sup>aAB</sup>   | 62 $\pm$ 10 <sup>aA</sup>      | 65 $\pm$ 12 <sup>aA</sup>      |
| Cu concentration (mg kg <sup>-1</sup> wet weight)       |                                 |                                |                               |                               |                                |                                |
| Gills                                                   | 1.9 $\pm$ 0.17 <sup>aC</sup>    | 2.2 $\pm$ 0.4 <sup>aC</sup>    | 2.2 $\pm$ 0.38 <sup>aC</sup>  | 1.5 $\pm$ 0.3 <sup>aC</sup>   | 2.2 $\pm$ 0.15 <sup>aC</sup>   | 2.4 $\pm$ 0.3 <sup>aC</sup>    |
| Liver                                                   | 17 $\pm$ 4.1 <sup>aA</sup>      | 16 $\pm$ 3.0 <sup>aA</sup>     | 27 $\pm$ 8.7 <sup>aA</sup>    | 19 $\pm$ 4.0 <sup>aA</sup>    | 121 $\pm$ 10 <sup>aA</sup>     | 106 $\pm$ 20 <sup>aA</sup>     |
| Kidneys                                                 | 6.2 $\pm$ 0.9 <sup>aB</sup>     | 6.0 $\pm$ 1.0 <sup>aB</sup>    | 4.3 $\pm$ 0.51 <sup>aB</sup>  | 3.5 $\pm$ 0.61 <sup>aB</sup>  | 6.9 $\pm$ 1.0 <sup>aB</sup>    | 10 $\pm$ 2.5 <sup>aB</sup>     |
| Pb concentration (mg kg <sup>-1</sup> wet weight)       |                                 |                                |                               |                               |                                |                                |
| Gills                                                   | 0.57 $\pm$ 0.084 <sup>aAB</sup> | 0.52 $\pm$ 0.08 <sup>aAB</sup> | 0.61 $\pm$ 0.15 <sup>aA</sup> | 0.52 $\pm$ 0.13 <sup>aA</sup> | 0.58 $\pm$ 0.061 <sup>aB</sup> | 0.57 $\pm$ 0.07 <sup>aB</sup>  |
| Liver                                                   | 0.40 $\pm$ 0.049 <sup>aB</sup>  | 0.46 $\pm$ 0.10 <sup>aB</sup>  | 0.73 $\pm$ 0.15 <sup>bA</sup> | 0.38 $\pm$ 0.08 <sup>aA</sup> | 0.86 $\pm$ 0.14 <sup>aAB</sup> | 0.76 $\pm$ 0.13 <sup>aAB</sup> |
| Kidneys                                                 | 0.86 $\pm$ 0.16 <sup>aA</sup>   | 0.77 $\pm$ 0.18 <sup>aA</sup>  | 0.85 $\pm$ 0.31 <sup>aA</sup> | 0.68 $\pm$ 0.13 <sup>aA</sup> | 1.0 $\pm$ 0.18 <sup>aA</sup>   | 1.13 $\pm$ 0.22 <sup>aA</sup>  |
| Cd concentration ( $\mu$ g kg <sup>-1</sup> wet weight) |                                 |                                |                               |                               |                                |                                |
| Gills                                                   | 25 $\pm$ 3.5 <sup>aC</sup>      | 21 $\pm$ 7.0 <sup>aC</sup>     | 19 $\pm$ 4.0 <sup>aC</sup>    | 15 $\pm$ 6.0 <sup>aC</sup>    | 22 $\pm$ 2.4 <sup>aC</sup>     | 28 $\pm$ 11 <sup>aC</sup>      |
| Liver                                                   | 62 $\pm$ 15 <sup>aB</sup>       | 61 $\pm$ 12 <sup>aB</sup>      | 54 $\pm$ 23 <sup>aB</sup>     | 39 $\pm$ 12 <sup>aB</sup>     | 182 $\pm$ 34 <sup>aB</sup>     | 174 $\pm$ 33 <sup>aB</sup>     |
| Kidneys                                                 | 228 $\pm$ 43 <sup>aA</sup>      | 242 $\pm$ 64 <sup>aA</sup>     | 174 $\pm$ 49 <sup>aA</sup>    | 153 $\pm$ 32 <sup>aA</sup>    | 284 $\pm$ 25 <sup>aA</sup>     | 296 $\pm$ 59 <sup>bA</sup>     |
